# Supplementary material for: Wolbachia-Induced Unidirectional Cytoplasmic Incompatibility and Speciation: Mainland-Island Model
Source: PLoS One. 2007 Aug 8;2(8):e701. doi: 10.1371/journal.pone.0000701 (PMC1934337; doi:10.1371/journal.pone.0000701)
Supplement: Text S4 — Equilibrium Frequencies of infected T 1 Individuals (0.03 MB DOC) [file pone.0000701.s004.doc]

**S4 Equilibrium Frequencies of infected *T*1 individuals**

Let denote the equilibrium frequency of infected individuals with genotype *T*1 on the island before the reproduction step. In order to derive an approximation for we assume that migrants mate only with residents. This is justified when migration is low. Further, we assume that *s* is small and neglect the effects of local selection.

Under these assumptions we can write down as a geometric series. The first summand, *m*, stands for migrants of the *F*0 generation. These are all infected and have genotype *T*1. The second summand, *m*(1-*f*)(1-*m*)/2, denotes the infected part of migrant offspring with genotype *T*1. To understand this term note first that we have to consider only the matriline because *Wolbachia* is transmitted cytoplasmically. The total number of (infected) female migrants is *m*/2 and because of the infection each of these females has on average 2(1-*f*) offspring. All of these offspring carry *Wolbachia* but only half of them have genotype *T*1. This is because migrants are supposed to be so rare that they have to mate exclusively with residents. Finally, we have to bear in mind that there is a new generation which is reflected by the factor (1-*m*). The full series takes into account all future generations and computes to

(33)

By using the formula for the geometric series, we get

(34) .

Linearization around *m* yields the approximation used in the results,

(35) .
